# Supplementary material
Source: publisher figshare collection journal article supplement (https://gsapubs.figshare.com/ndownloader/files/38882946)
Supplement: Supplementary file 1 [file 38882946]

## Sheet: Sheet1
Sample type	Date	δ18Owater (‰, VSMOW)	δDwater (‰, VSMOW)	Lithium (mg/L)
brine	2010-02-23	-10.9	-102.5	384.1
brine	2010-02-23	-14	-112.4	84.1
brine	2010-02-23	-12.3	-109.7	94.8
brine	2010-02-23	-10.6	-96.4	204.9
brine	2010-02-23	-11.2	-103.4	141.4
brine	2010-02-23	-11.2	-101.5	275.6
brine	2010-02-23	-12.7	-111.9	114.9
brine	2010-02-23	-3.5	-66.2	256.2
brine	2010-02-23	-13.1	-114	90.7
brine	2010-05-18	-12.4	-111.6	98.3
brine	2010-05-18	-11.1	-104.3	148.9
brine	2010-05-18	-14.7	-115.2	65.7
brine	2010-05-18	-12.4	-107	114.1
brine	2010-05-18	-12.3	-111.4	84.9
brine	2010-05-18	-12	-108.8	99.2
brine	2010-05-18	-11.2	-100.6	315.4
brine	2010-05-18	-10.4	-98.3	406.9
brine	2010-05-18	-11.3	-98.4	352.3
brine	2010-05-18	-11.1	-101.5	396.4
brine	2010-05-18	-9.6	-95.3	355.1
brine	2010-05-18	-10.1	-95.6	287.4
brine	2010-05-18	-13.1	-115.1	109
brine	2010-05-18	-3.9	-68.5	344.8
brine	2010-05-18	-13.2	-114.9	109.6
brine	2010-05-18	-12.4	-107.7	218.9
brine	2010-05-18	-10.8	-103	211.6
brine	2010-05-18	-10.4	-100.5	280.8
brine	2010-05-18			221.6
brine	2011-05-19	-11.3	-105.6	141.3
brine	2011-05-19	-12.4	-107	117.5
brine	2011-05-19	-12.2	-107.3	131.5
brine	2011-05-19	-11.6	-106	160.4
brine	2011-05-19	-10.3	-99.9	270.3
brine	2011-05-23	-14.7	-114.4	61
brine	2011-05-23	-12.6	-113	83.8
brine	2011-05-23	-12.7	-115.7	72.2
brine	2011-05-23	-13.1	-114	70.9
brine	2011-05-23	-12.9	-115.8	73.6
brine	2011-05-23	-13.6	-111.6	88
brine	2011-05-23	-9.7	-95	369
brine	2011-05-23	-10.1	-96.5	375.2
brine	2011-05-23	-10.4	-96.7	285.5
brine	2011-05-23	-13.2	-115.6	109.9
brine	2011-05-23	-4.1	-73.2	275.6
brine	2011-05-23	-13.2	-117.7	110.9
brine	2011-05-23	-13.6	-111.8	112.2
brine	2011-05-23	-12.9	-114	88.9
brine	2011-05-23	-13.2	-115.7	67.3
brine	2011-05-24	-11.9	-105.3	152
brine	2011-05-24	-14.5	-117	76.6
brine	2011-05-24	-12.1	-110.9	100.5
brine	2011-05-24	-11.4	-107.6	180.1
brine	2011-05-24	-12.2	-110	122.7
brine	2011-05-24	-12.8	-113.7	110.4
brine	2011-05-24	-12.3	-106.9	191.1
brine	2011-05-24	-10.2	-100.4	268.9
brine	2012-05-14	-12.9	-113.7	140.4
brine	2012-05-15	-12.8	-113.8	96.3
brine	2012-05-15	-12.8	-115.1	114.1
brine	2012-05-15	-10.2	-97.6	300.3
brine	2012-05-15	-10	-96.8	85.4
brine	2012-05-15	-4.2	-74.9	179.1
brine	2012-05-15	-12.8	-113.9	71.2
brine	2012-05-15	-8.6	-93.1	201.8
brine	2012-05-16	-14.1	-117.2	96.6
brine	2012-05-16	-14.1	-115.1	102
brine	2012-05-16	-14.5	-115.4	77.1
brine	2012-05-16	-9.6	-98.9	94.4
brine	2012-05-16	-12.4	-109.8	125.9
brine	2012-05-16	-12.5	-108.9	224.7
brine	2012-05-16	-1.8	-61.2	1130.7
brine	2012-05-16	-0.1	-57.8	688.1
brine	2012-05-16	10.2	-20	5155.2
brine	2012-05-16	-20.5	-158.4
brine	2012-05-18	-9.4	-100.2	196
brine	2014-05-23	-10.8	-101.1	232.6
brine	2014-05-23	-9.4	-94.3
brine	2014-05-23	-4.8	-74.6	381.6
brine	2014-05-23	-12.8	-109.2	102
brine	2014-05-23	-9.9	-99.2	78.2
brine	2014-05-23	-11.9	-112	82.6
brine	2014-05-23	-12.8	-112.6	59.9
brine	2014-05-23	-9.4	-96.5	231.6
brine	2014-05-23	-5.5	-73.4
brine	2014-05-23	-9	-95.8	128.9
brine	2014-05-23	-13.3	-114	102.7
brine	2018-10-04	-9.69	-95.67	249
brine	2018-10-04	-11.48	-106.03	123
brine	2018-10-04	-10.85	-101.24	175
brine	2018-10-04	-5.42	-76.13	462
brine	2018-10-04	-12.26	-109.24	80
brine	2018-10-04	-12.65	-111.46	88
brine	2018-10-04	-8.42	-90.94	241
brine	2018-10-04	-11.52	-105.24	134
brine	2018-10-04	-10.7	-101.56	177
brine	2018-10-04	-14.13	-112.81	63
brine	2018-10-04	-14.04	-112.21	80
brine	2018-10-04	-12.43	-110.78	69
brine	2018-10-04	-5.09	-55.33
brine	2018-10-04	-12.79	-111.08	87
brine	2018-10-10	-12.2	-108.59	97
brine	2018-10-10	-12.84	-109.64	97
brine	2018-10-10	-12.44	-105.19	109
brine	2018-10-10	-13.03	-111.22	63
brine	2018-10-10	-11.38	-104.85	96
brine	2018-10-10	-11.66	-103.51	108
brine	2018-10-10	-14.24	-113.16	69
brine	2018-10-10	-14.41	-112.99	47
brine	2018-10-10	-12.78	-113.04	59
brine	2018-10-10	-12.39	-111.75	56
brine	2018-10-10	-12.71	-112.31	53
brine	2018-10-10	-11.66	-101.78	85
brine	2018-10-10	-13.4	-111.52	49
brine	2018-10-18	-11.02	-98.82	162
brine	2018-10-18	-13.54	-110.36	68
brine	2018-10-18	-13.01	-114.02	77
cs	2010-02-24	-14.5	-110.4	0
cs	2010-02-24	-14.6	-108.6	0.1
cs	2010-05-16	0	-57.1	0.2
cs	2010-05-16	-12.5	-100.4	0
cs	2010-05-16	-12.1	-111.7	1.3
cs	2010-05-16	-14.5	-111.2	0.2
cs	2010-05-19	-13.7	-106.3	0.1
cs	2010-05-21	-14	-109.2	0
cs	2010-05-21	-13.8	-107.7	0.1
cs	2010-05-21	-13.9	-104.5	0
cs	2010-05-21	-13.7	-105.1	0
cs	2010-05-21	-14.6	-109.8	0.1
cs	2010-05-22	-13.5	-104.7	0.1
cs	2010-05-22	-14	-105.5	0.1
cs	2011-05-20	-13.8	-109.3	0
cs	2011-05-20	-13.8	-110.4	0.2
cs	2011-05-20	-13.9	-105.6	0
cs	2011-05-20	-14.8	-112.1	0.1
cs	2011-05-21	-14.3	-109.1	0.1
cs	2011-05-21	-13.8	-108.1	0
cs	2011-05-21	-13.2	-103	0
cs	2011-05-21	-13.4	-103.8	0
cs	2011-05-21	-13	-103	0
cs	2011-05-21	-13.5	-109.6	0.1
cs	2011-05-22	-13.7	-105.8	0
cs	2011-05-22	-7.7	-78.2	0.3
cs	2011-05-22	-13.8	-106.8	0.1
cs	2011-05-24	-13.5	-107.6	0.1
cs	2011-05-24	-12.2	-99.2	0
cs	2011-05-24	-13.3	-107	0.1
cs	2011-05-24	-11.9	-99	0
cs	2011-05-24	-12.6	-102.5	0
cs	2011-05-26	-9.3	-87.5	0.1
cs	2011-05-26	-13.8	-109.6	0.1
cs	2011-05-26	-13.3	-105.8	0.1
cs	2012-05-13	-15	-127.6	2.2
gw	2010-02-23	-15.1	-115.6	0.1
gw	2010-05-19	-15.3	-117.6	0.1
gw	2010-05-19	-13.7	-117.7	40.8
gw	2011-05-22	-13.5	-117.5	41.1
gw	2011-05-25	-15.4	-120.1	6.9
gw	2011-05-25	-15.8	-121.6	1.7
gw	2011-05-25	-14.9	-115.4	1.3
gw	2011-05-26	-14.8	-113.7	1.9
gw	2011-05-26	-13.7	-114.8	6.2
gw	2011-05-26	-13.2	-111	36.5
gw	2011-05-26	-15	-120.2	0.1
gw	2011-05-26	-15.2	-117.4	0.1
gw	2012-05-14	-15.1	-116	0.1
gw	2012-05-15	-13.6	-116.1	29.5
gw	2012-05-15	-15	-116.7	0.1
gw	2012-05-16	-15	-118	0.1
gw	2012-05-16	-15.1	-120	0.1
gw	2012-05-16	-13.6	-117	39
gw	2012-05-18	-15.3	-119.7	6.7
gw	2012-05-18	-15.8	-119.1	1.4
gw	2012-05-18	-14.9	-117.3	1.3
gw	2012-05-18	-14.6	-112.6	2.1
gw	2014-05-23	-13.9	-115.4	35.2
gw	2014-05-24	-14.6	-117.2	1.5
gw	2014-05-24	-13.3	-118.1	37.7
hs	2010-02-22	-14.3	-117.7	1.7
hs	2010-05-16	-14.6	-119.6	1.6
hs	2010-05-16	-15.4	-126.3	0.7
hs	2010-05-22	-12.6	-120.7	5.8
hs	2011-05-22	-14.6	-120.8	2
hs	2012-05-13	-12.6	-121.6	5.1
hs	2012-05-13	-15.9	-127.4	0.7
hs	2012-05-13	-15.8	-125.2	0.7
hs	2012-05-14	-14.5	-118	1.8
snow	2010-02-21	-16.3	-121	0
stream	2012-05-13	-16.7	-126.4	0
tap	2010-05-22	-14.4	-110.9	0.1
Note: Lithium concentrations were previous reported in Coffey et al. (2021)
